# Supplementary material
Source: HighWire-hosted journal article supplement (https://cmajopen.ca/highwire/filestream/89697/field_highwire_adjunct_files/4/open-2022-0130-5-at.pdf)
Supplement: open-2022-0130-5-at.pdf [file open-2022-0130-5-at.pdf]

## List of excluded full-text studies with reasons

### a. Does not address guideline development (n=114)

1. Arnett, D. K. et al. 2019 ACC/AHA Guideline on the Primary Prevention of Cardiovascular Disease: A Report of the American College of Cardiology/American Heart Association Task Force on Clinical Practice Guidelines. *Circulation* 140, e596–e646.
2. Ward, M. et al. A conceptual framework for evaluating health equity promotion within community-based participatory research partnerships. *Evaluation & Program Planning* 70, 25–34.
3. Glover, R. E. et al. A framework for identifying and mitigating the equity harms of COVID-19 policy interventions. *Journal of Clinical Epidemiology* 15 (2020).
4. Ilton, M. K. et al. A framework for overcoming disparities in management of acute coronary syndromes in the Australian Aboriginal and Torres Strait Islander population. A consensus statement from the National Heart Foundation of Australia. *Medical Journal of Australia* 200, 639–643 (2014).
5. National Collaborating Centre for Determinants of Health. A guide to assessment tools for organizational health equity capacity. (2020).
6. D'Alton, P. & Reygan, F. C. G. A pilot training program for health care professionals providing palliative and oncological care to Lesbian, Gay and Bisexual (LGB) patients. *Psycho-Oncology* 20, 131–132 (2011).
7. Jackson, F. M. et al. A Prematurity Collaborative Birth Equity Consensus Statement for Mothers and Babies. *Maternal & Child Health Journal* 24, 1231–1237 (2020).
8. Kano, M. et al. Addressing Cancer Disparities in SGM Populations: Recommendations for a National Action Plan to Increase SGM Health Equity Through Researcher and Provider Training and Education. *Journal of Cancer Education* 35, 44–53.
9. Parsons, S. Addressing Racial Biases in Medicine: A Review of the Literature, Critique, and Recommendations. *International Journal of Health Services* 50, 371–386 (2020).
10. Hernández-Cancio, S., Albritton, E. & Fishman, E. Advancing A Health System Transformation Agenda Focused On Achieving Health Equity. *Health Affairs* 7.
11. Ogbolu, Y. & Fitzpatrick, G. A. Advancing Organizational Cultural Competency With Dissemination and Implementation Frameworks: Towards Translating Standards into Clinical Practice. *Advances in Nursing Science* 38, 203–214 (2015).
12. Ju, M. et al. Affordable Care Act Medicaid expansion does not reduce guideline concordant cancer care disparities in vulnerable populations. *Journal of Clinical Oncology*. Conference 38, (2020).
13. Nunn, A. et al. African American Community Leaders' Policy Recommendations for Reducing Racial Disparities in HIV Infection, Treatment, and Care: Results From a Community-Based Participatory Research Project in Philadelphia, Pennsylvania. *Health Promotion Practice* 16, 91–100 (2015).
14. Griggs, J. et al. American Society of Clinical Oncology Position Statement: Strategies for Reducing Cancer Health Disparities Among Sexual and Gender Minority Populations. *Journal of Clinical Oncology* 35, 2203–2208 (2017).
15. Legha, R. K. & Miranda, J. An Anti-Racist Approach to Achieving Mental Health Equity in Clinical Care. *Psychiatric Clinics of North America* 43, 451–469 (2020).
16. National Institute for Health and Care Excellence. Annual Equality Report 2016-17. (2017).
17. National Institute for Health and Care Excellence. Annual Equality Report 2017-18. (2018).
18. National Institute for Health and Care Excellence. Annual Equality Report 2018/19. (2019).
19. Mulley, C., Ma, L., Clifton, G. & Tanner, M. Are Network Planning Guidelines Based on Equal Access Equitable? *Transp. Res. Record* 1–11 (2017) doi:10.3141/2651-01.
20. Silva, A., Rauscher, G. H., Hoskins, K., Rao, R. & Ferrans, C. E. Assessing racial/ethnic disparities in chemotherapy treatment among breast cancer patients in context of changing treatment guidelines. *Breast Cancer Research & Treatment* 142, 667–672 (2013).
21. Baltussen, R. et al. Balancing efficiency, equity and feasibility of HIV treatment in South Africa - development of programmatic guidance. *Cost Effectiveness & Resource Allocation* 11, 26 (2013).

22. Gonzalez, V., Lara, O. D., Kamath, P. N. & Aguilar, V. D. C. Bridging the disparities gap: Implementation of a clinical practice guideline. *Gynecologic Oncology* 154 (Supplement 1), 115 (2019).
23. Elijah Herington, A. S., Deirdre DeJean, Charlene Argáez. Building Inclusive Health Care Services: A Rapid Qualitative Review. (2020).
24. CDC COVID-19 Response Health Equity Strategy. 5.
25. Payne, G. H. et al. CDC's Health Equity Resource Toolkit: Disseminating Guidance for State Practitioners to Address Obesity Disparities. *Health Promotion Practice* 16, 84–90 (2015).
26. Porcherie, M., Le Bihan-Youinou, B. & Pommier, J. Changing modalities of action to address social inequalities in health in international and French policy recommendations. *Sante Publique (Vandoeuvre-Les-Nancey)* 30, 33–46 (2018).
27. Welch, V. A. et al. Chapter 16: Equity and specific populations. *Cochrane Training* 32.
28. Polite, B. N. et al. Charting the Future of Cancer Health Disparities Research: A Position Statement from the American Association for Cancer Research, the American Cancer Society, the American Society of Clinical Oncology, and the National Cancer Institute. *Cancer Research* 77, 4548–4555.
29. Omenukor, K. Colorectal Cancer Awareness and Screening Guideline for African American Popula. *Colorectal Cancer Awareness & Screening Guideline For African American Popula* 1–1 (2018).
30. Eslava-Schmalbach, J. et al. Conceptual framework of equity-focused implementation research for health programs (EquiR). *Int J Equity Health* 18, 80 (2019).
31. Plamondon, K. M., C. S. Cajax, Ian D. Graham & Joan L. Bottorff. Connecting knowledge with action for health equity: a critical interpretive synthesis of promising practices. *International Journal for Equity in Health* 18, (2019).
32. Robertson, K. N. Considering the Social Determinants of Equity in International Development Evaluation Guidance Documents. *Can. J. Program Eval.* 30, 344–373 (2016).
33. Belot, A. et al. Describing the association between socioeconomic inequalities and cancer survival: methodological guidelines and illustration with population-based data. *Clinical Epidemiology* 10, 561–573 (2018).
34. Goodman, M. S., Gilbert, K. L., Hudson, D., Milam, L. & Colditz, G. A. Descriptive Analysis of the 2014 Race-Based Healthcare Disparities Measurement Literature. *Journal of Racial & Ethnic Health Disparities* 29, 29 (2016).
35. Ngongo, P. et al. Developing standards of care for HIV prevention research in developing countries – a case study of 10 research centers in Eastern and Southern Africa. *AIDS Care* 24, 1277–1289 (2012).
36. Ahmed, S., Shahid, R. K. & Episkenew, J. A. Disparity in cancer prevention and screening in aboriginal populations: recommendations for action. *Current Oncology* 22, 417–426 (2015).
37. Jull, J. et al. Engaging knowledge users in development of the CONSORT-Equity 2017 reporting guideline: a qualitative study using in-depth interviews. *Research Involvement & Engagement* 4, 34 (2018).
38. Browne, A. J. et al. Enhancing health care equity with Indigenous populations: evidence-based strategies from an ethnographic study. *BMC Health Services Research* 16, 544.
39. Canadian Medical Association. *Equity and Diversity in Medicine*. 5 (2019).
40. Pan American Health Organization. Office of External Relations. *Equity in Health Policy Assessment: Region of the Americas*. (Pan American Health Organization, 2002).
41. Pinto, A. D. et al. Equity in public health standards: a qualitative document analysis of policies from two Canadian provinces. *International Journal for Equity in Health* 11, 28–37 (2012).
42. Vallgarda, S. Ethics, equality and evidence in health promotion Danish guidelines for municipalities. *Scandinavian Journal of Public Health* 42, 337–343 (2014).
43. Welch, V. et al. Extending the PRISMA statement to equity-focused systematic reviews (PRISMA-E 2012): explanation and elaboration. *Journal of Clinical Epidemiology* 70, 68–89 (2016).
44. Matsuda, Y., Brooks, J. L. & Beeber, L. S. Guidelines for research recruitment of underserved populations (EERC). *Applied Nursing Research* 32, 164–170.
45. Crowshoe, L. et al. Health and Health Care Implications of Systemic Racism on Indigenous Peoples in Canada. 10.

46. Marcela Valencia, Diego Fernando Rojas Gualdrón, Jorge Hernán García Restrepo & Manuela Berrío Bedoya. Health and implementation outcomes in primary health care strategies. Lessons learned to achieve health equity through health policy. A systematic review. PROSPERO CRD42019127991, (2019).
47. Population and Public Health Division, M. of H. and L.-T. C. Health Equity Guideline, 2018. Toronto, ON: Queen's Printer for Ontario. 20 (2018).
48. CIHR Institute of Population and Public Health. Health Equity Matters. (2015).
49. WHO. Health Equity Policy Tool: A framework to track policies for increasing health equity in the WHO European Region. (2019).
50. National Center for Chronic Disease Prevention and Health Promotion. Health Equity Resource Toolkit for State Practitioners Addressing Obesity Disparities. 83.
51. Welch, V. A. et al. Health equity: evidence synthesis and knowledge translation methods. *Systematic Reviews* 2, 43 (2013).
52. Health Quality Ontario. Health Technology Assessments Methods and Process Guide. (2018).
53. WHO. Healthy, prosperous lives for all: the European Health Equity Status Report. (2019).
54. Van Vliet, J. How to apply the evidence-based recommendations for greater health equity into policymaking and action at the local level? *Scandinavian Journal of Public Health* 46, 28–36 (2018).
55. Rodriguez, F. & Ferdinand, K. C. Hypertension in Minority Populations: New Guidelines and Emerging Concepts. *Advances in Chronic Kidney Disease* 22, 145–153 (2015).
56. Williams, S. K., Ravenell, J., Seyedali, S., Nayef, S. & Ogedegbe, G. Hypertension Treatment in Blacks: Discussion of the U.S. Clinical Practice Guidelines. *Progress in Cardiovascular Diseases* 59, 282–288 (2016).
57. Holliman, K. et al. Implementation of Hemorrhage Guidelines Reveals Racial Disparities in Transfusion Requirements. *Obstet. Gynecol.* 135, 139S-139S (2020).
58. Teunissen, E. et al. Implementing guidelines and training initiatives to improve cross-cultural communication in primary care consultations: a qualitative participatory European study. *International Journal for Equity in Health* 16, 32.
59. Westby, C. Implementing recommendations of the World Report on Disability for indigenous populations. *International Journal of Speech-Language Pathology* 15, 96–100 (2013).
60. Sastre, F., Rojas, P., Cyrus, E., De La Rosa, M. & Khoury, A. H. Improving the health status of Caribbean people: recommendations from the Triangulating on Health Equity summit. *Global Health Promotion* 21, 19–28 (2014).
61. Mumtaz, Z., Salway, S. & Nyagero, J. Improving the standards-based management: recognition initiative to provide high-quality, equitable maternal health services in Malawi. An implementation research protocol (vol 1, 2016). *BMJ Glob. Health* 1, 1 (2016).
62. Chase Simms. Increasing Organizational Capacity for Health Equity Work: A Literature Review for Health Nexus. 39 (2017).
63. Scime, S. Inequities in cancer care among transgender people: Recommendations for change. *Canadian Oncology Nursing Journal* 29, 87–96 (2019).
64. Hassen, N., Tyler, I. & Manson, H. Influence of revised public health standards on health equity action: a qualitative study in Ontario, Canada. *International Journal for Equity in Health* 16, 1–11 (2017).
65. Baumann, S. D. et al. INFUSING CULTURAL COMPETENCE TRAINING INTO D ISABILITY LEADERSHIP PROGRAMS: PERCEPTIONS AND RECOMMENDATIONS. *Journal of Cultural Diversity* 27, 31–46 (2020).
66. Laura Anderson & Seong-gee Um. *International Review of Health Equity Strategies*. (2016).
67. Saunders, M., Barr, B., McHale, P. & Hamelmann, C. Key policies for addressing the social determinants of health and health inequities. (2017).
68. Penman-Aguilar, A. et al. Measurement of Health Disparities, Health Inequities, and Social Determinants of Health to Support the Advancement of Health Equity: *Journal of Public Health Management and Practice* 22, S33–S42 (2016).
69. Mukerjee, R. Mental Health in the Primary Care of Trans Patients. *Mental Health in the Primary Care of Trans Patients* 1–1 (2017).
70. Office of Minority Health. National Standards for Culturally and Linguistically Appropriate Services (CLAS) in Health and Health Care. 2 <https://thinkculturalhealth.hhs.gov/clas>.

71. Ismail, S. J., Matthew C. Tunis, Linlu Zhao & Caroline Quach. Navigating Inequities: A roadmap out of the pandemic. 15 (2020).
72. New Zealand Medical, A. New Zealand Medical Association. Health equity position statement. *New Zealand Medical Journal* 124, 10-following 86 (2011).
73. Mantoura, P. & Morrison, V. Policy Approaches to Reducing Health Inequalities. (2016).
74. Ontario Public Health Association. Position Statement on Applying a Health Equity Lens.
75. Government of Canada. Preliminary guidance on key populations for early COVID-19 immunization. (2020).
76. Haggerty, J. et al. Proactive Strategies to Address Health Equity and Disparities: Recommendations from a Bi-National Symposium. *Journal of the American Board of Family Medicine: JABFM* 31, 479–483 (2018).
77. Carrillo Zuniga, G., Yoon-Ho, S., Dadig, B., Kent Guion, W. & Rice, V. Progression in Understanding and Implementing the Cultural and Linguistic Appropriate Services Standards. *Health Care Manager* 32, 167–172 (2013).
78. Plamondon, K. M. Promising practices for connecting knowledge to action for health equity. (The University of British Columbia, 2019).
79. Albanti, I. & Baker, K. Promoting consistency, fairness, and transparency: Development and implementation of partnership eligibility criteria and selection process guidelines for the global health initiative. *Pediatric Blood and Cancer* 63 (Supplement 3), S149 (2016).
80. Community Preventive Services Task Force. Promoting Health Equity Through Education Programs and Policies: Center Based Early Childhood Education. (2016).
81. Community Preventive Services Task Force. Promoting Health Equity Through Education Programs and Policies: Full-Day Kindergarten Programs Task Force Finding and Rationale Statement.
82. Community Preventive Services Task Force. Promoting Health Equity Through Education Programs and Policies: School Based Health Centers. (2016).
83. Sampson, U. K. A. et al. Reducing Health Inequities in the U.S.: Recommendations From the NHLBI's Health Inequities Think Tank Meeting. *Journal of the American College of Cardiology* 68, 517–524.
84. Petkovic, J. et al. Reporting of health equity considerations in cluster and individually randomized trials. *Trials [Electronic Resource]* 21, 308 (2020).
85. McKenzie, K., Metcalfe, D., Murray, G. & Michie, A. Service provision in Scotland for people with an intellectual disability and dementia: adherence to good practice guidelines. *Learning Disability Practice* 22, 26–33 (2019).
86. Tannenbaum, C., Clow, B., Haworth-Brockman, M. & Voss, P. Sex and gender considerations in Canadian clinical practice guidelines: a systematic review. *CMAJ open* 5, E66–E73 (2017).
87. Heidari, S., Babor, T. F., Castro, P., Tort, S. & Curno, M. Sex and Gender Equity in Research: rationale for the SAGER guidelines and recommended use. *Epidemiologia e Servicos de Saude* 26, 665–675 (2017).
88. WHO. Strategic mapping of institutional frameworks and their approach to equity.
89. Scharffscher, K. S. & Olsen, O. E. Strengthening women's security in crisis? The virtual implementation of strategies and guidelines. *Journal of Emergency Management* 9, 49–59 (2011).
90. K. Bergeron. Supporting the policy-making process: A workbook. (2018).
91. Jull, J. et al. Taking an integrated knowledge translation approach in research to develop the CONSORT-Equity 2017 reporting guideline: an observational study. *BMJ Open* 9, e026866.
92. Burford, B. J. et al. Testing the PRISMA-Equity 2012 reporting guideline: the perspectives of systematic review authors. *PLoS ONE [Electronic Resource]* 8, e75122 (2013).
93. Spitzer-Shohat, S. & Chin, M. The 'waze' of inequity reduction frameworks for organizations. *International Journal of Integrated Care (IJIC)* 19, 1–2 (2019).
94. De Marchis, E. H., Willard-Grace, R., Olayiwola, J. N. & Doekhie, K. The Impact of the Patient-Centered Medical Home on Health Care Disparities: Exploring Stakeholder Perspectives on Current Standards and Future Directions. *Population Health Management* 22, 99–107 (2019).
95. Guichard, A., Ridde, V., Nour, K. & Lafontaine, G. The REFLEX-ISS tool: taking better account of social inequalities in health. <http://www.equitesante.org/chair-realisme/tools/reflex-iss/> (2015).

96. Woolfenden, S. et al. The Royal Australasian College of Physicians Paediatric & Child Health Division 145 Macquarie Street, Sydney, NSW, 2000 Summary of position statement on inequities in child health Published by RACP May 2018 and available at: <https://www.racp.edu.au/advocac>. *Journal of Paediatrics & Child Health* 54, 832–833.
97. Dankwa-Mullan, I. et al. The science of eliminating health disparities: summary and analysis of the NIH Summit recommendations. *American Journal of Public Health* 100, S12-8 (2010).
98. Mills, S. L., Brady, T. J., Jayanthan, J., Ziabakhsh, S. & Sargious, P. M. Toward consensus on self-management support: the international chronic condition self-management support framework. *Health Promotion International* 32, 942–952 (2017).
99. Aldrich, M. et al. Who Gets Screened for Lung Cancer? A Simple Adjustment to Current Guidelines to Reduce Racial Disparities. *Journal of Thoracic Oncology* 13 (10 Supplement), S426–S427 (2018). Centers for Medicare & Medicaid Services. CMS Framework for Health Equity 2022–2032.; 2022:40.
100. Centers for Medicare & Medicaid Services. CMS Framework for Health Equity 2022–2032.; 2022:40.
101. Haute Autorite de Sante. Sex, gender and health. Published online 2020.
102. National Health and Medical Research Council. NHMRC Gender Equity Strategy 2022–2025. <https://www.nhmrc.gov.au/sites/default/files/documents/attachments/NHMRC%20-%20Gender%20Equity%20Strategy%20Diagram.pdf>
103. Public Health Agency of Canada. How to Integrate Intersectionality Theory in Quantitative Health Equity Analysis? A Rapid Review and Checklist of Promising Practices. PHAC; 2022.
104. Registered Nurses' Association of Ontario. Promoting 2SLGBTQI+ Health Equity. Published online 2021. <https://rnao.ca/bpg/guidelines/promoting-2slgbtqi-health-equity>
105. Megwalu UC, Raol NP, Bergmark R, Osazuwa-Peters N, Brenner MJ. Evidence-Based Medicine in Otolaryngology, Part XIII: Health Disparities Research and Advancing Health Equity. *Otolaryngol Head Neck Surg.* 2022;166(6):1249-1261. doi:10.1177/01945998221087138
106. Access Alliance. Health Equity Toolkit: A Resource Inventory for Health Care Organizations.; 2018. [https://www.allianceon.org/sites/default/files/documents/Health%20Equity%20Toolkit\\_Final.pdf](https://www.allianceon.org/sites/default/files/documents/Health%20Equity%20Toolkit_Final.pdf)
107. Browne AJ, Varcoe C, Ford-Gilboe M, Wathen CN, on behalf of the EQUIP Research Team. EQUIP Healthcare: An overview of a multi-component intervention to enhance equity-oriented care in primary health care settings. *Int J Equity Health.* 2015;14:152. doi:10.1186/s12939-015-0271-y
108. Canadian Council on Social Determinants of Health. A Review of Frameworks on the Determinants of Health.; 2015. Accessed December 1, 2020. <https://www.deslibris.ca/ID/247862>
109. Centers for Disease Control and Prevention. Best Practices User Guide: Health Equity in Tobacco Prevention and Control. Department of Health and Human Services, Centers for Disease Control and Prevention, National Center for Chronic Disease Prevention and Health Promotion, Office on Smoking and Health; 2015.
110. Health Quality Ontario (HQO). Health Quality Ontario's Health Equity Plan. Accessed December 1, 2020. <https://www.hqontario.ca/What-is-Health-Quality/Health-Equity-and-Quality/Our-Health-Equity-Plan>
111. Nelson HD, Cantor A, Wagner J, et al. Achieving Health Equity in Preventive Services. Agency for Healthcare Research and Quality (AHRQ); 2019. doi:10.23970/AHRQEPCCER222
112. Office of Minority Health. The CMS Equity Plan for Improving Quality in Medicare. U.S. Centers for Medicare & Medicaid Services; 2015:19. [https://www.cms.gov/About-CMS/Agency-Information/OMH/OMH\\_Dwnld-CMS\\_EquityPlanforMedicare\\_090615.pdf](https://www.cms.gov/About-CMS/Agency-Information/OMH/OMH_Dwnld-CMS_EquityPlanforMedicare_090615.pdf)
113. Ontario Public Health Association. A Health Equity Action Plan for the Ontario Public Health Association for 2015-17 to 2017-18.; 2016.
114. Pauly, B., MacDonald, M., Hancock, T., et al. Health Equity Tools 2.0. University of Victoria; 2016. [www.uvic.ca/elph](http://www.uvic.ca/elph)

**b. Does not address health equity (n=19)**

1. Arnett, D. K. et al. 2019 ACC/AHA Guideline on the Primary Prevention of Cardiovascular Disease: Executive Summary: A Report of the American College of Cardiology/American Heart Association Task Force on Clinical Practice Guidelines. *Circulation* 140, e563–e595.
2. Dainton, C., Chu, C. H., Lin, H., Cherniak, W. & Loh, L. C. A Protocol to Develop Practice Guidelines for Primary Care Medical Service Trips. *Annals of Global Health* 82, 678–685 (2016).
3. Mahoney, A. D., Westphaln, K. K., Covelli, A. F. & Mullan, F. Advancing Social Mission in Nursing Education: Recommendations From an Expert Advisory Board. *Journal of Nursing Education* 59, 433–433 (2020).
4. Stratil, J. M. et al. Advancing the WHO-INTEGRATE Framework as a Tool for Evidence-Informed, Deliberative Decision-Making Processes: Exploring the Views of Developers and Users of WHO Guidelines. *International Journal of Health Policy & Management* 27, 27 (2020).
5. Hunter, J., Leach, M., Braun, L. & Bensoussan, A. An interpretive review of consensus statements on clinical guideline development and their application in the field of traditional and complementary medicine. *BMC Complementary & Alternative Medicine* 17, 1–11 (2017).
6. Frank, J. & Haw, S. Best practice guidelines for monitoring socioeconomic inequalities in health status: lessons from Scotland. *Milbank Quarterly* 89, 658–693 (2011).
7. Lee, Y. & McIntyre, R. Disparities in the Development and Implementation of Guidelines for the Management of Depression in Adults. *Biological Psychiatry* 87 (9 Supplement), S382 (2020).
8. DeMartino, J. K. & Larsen, J. K. Equity in cancer care: pathways, protocols, and guidelines. *Journal of the National Comprehensive Cancer Network* 10 Suppl 1, S1-9 (2012).
9. Leung, T. I. & Dumontier, M. FAIR Principles for Clinical Practice Guidelines in a Learning Health System. *Studies in Health Technology & Informatics* 264, 1690–1691 (2019).
10. Milnes, K. III. Challenging the Sexual Double Standard: Constructing Sexual Equality Narratives as a Strategy of Resistance. *Feminism Psychol.* 20, 255–259 (2010).
11. Nair, M. et al. Improving the Quality of Health Care Services for Adolescents, Globally: A Standards-Driven Approach. *Journal of Adolescent Health* 57, 288–298 (2015).
12. King, D., Wright, D., Gallagher, R., Allen, L. & Wakefield, K. IPS & RCN Position Statement: Equity and excellence: Liberating the NHS Securing continuing infection prevention support for NHS England. *Journal of Infection Prevention* 12, 97–100 (2011).
13. van Munster, B. C., Portielje, J. E. A., Maier, A. B., Arends, A. J. & de Beer, J. J. A. Methodology for senior-proof guidelines: A practice example from the Netherlands. *Journal of Evaluation in Clinical Practice* 24, 254–257 (2018).
14. Health Quality Ontario. *Quality Matters: Realizing Excellent Care for All.* (2017).
15. St-Pierre, L. Selected Tools to Facilitate the Integration of Health in All Policies. 14 (2017).
16. Utrankar, A. et al. Technology use and preferences to support clinical practice guideline awareness and adherence in individuals with sickle cell disease. *Journal of the American Medical Informatics Association* 25, 976–988.
17. Bracken-Roche, D., Bell, E., Macdonald, M. E. & Racine, E. The concept of ‘vulnerability’ in research ethics: an in-depth analysis of policies and guidelines (vol 15, pg 8 ,2017). *Health Res. Policy Syst.* 15, 4 (2017).
18. Chou, R. et al. The Global Spine Care Initiative: applying evidence-based guidelines on the non-invasive management of back and neck pain to low- and middle-income communities. *European Spine Journal* 27, 851–860.
19. Gandjour, A. Welfare gains and losses caused by clinical practice guidelines. *Expert Review of Pharmacoeconomics and Outcomes Research* 14, 27–33 (2014).

**c. Ineligible study design (n=19)**

1. Anderson, M. G. et al. A clinical perspective of the U.S. anti-vaccination epidemic: Considering marginal costs and benefits, CDC best practices guidelines, free riders, and herd immunity. *Vaccine* 38, 7877–7879 (2020).

2. Iyer, A., Srinidhi, V., Sreevathsa, A. & Sen, G. Adapting maternal health practice to co-morbidities and social inequality: A systematic approach. *Canadian journal of public health = Revue canadienne de sante publique* 108, 448–451 (2017).
3. NHS. Equality and Health Inequality NHS RightCare Packs.
4. Anderson, B. O. Evidence-based methods to address disparities in global cancer control: The development of guidelines in Asia. *The Lancet Oncology* 14, 1154–1155 (2013).
5. Szychlinski, C. et al. Food allergy emergency preparedness in Illinois schools: rural disparity in guideline implementation. *The Journal of Allergy & Clinical Immunology in Practice* 3, 805–807.e808 (2015).
6. Adami, G. et al. Gender disparity in authorship of guidelines and recommendations in rheumatology. *Annals of the Rheumatic Diseases* 79, 1122–1123.
7. Ravinetto, R. et al. Governance and Standards in International Clinical Research: The Role of Transnational Consortia. *American Journal of Bioethics* 16, 59–61 (2016).
8. van Leeuwen, D. Health Equity: A Key CDS Component. *Health Equity* 3.
9. Haack, L. M., Meza, J., Jiang, Y. Y., Araujo, E. A. & Pfiffner, L. Influences to ADHD Problem Recognition: Mixed-Method Investigation and Recommendations to Reduce Disparities for Latino Youth (vol 45, pg 958, 2018). *Adm. Policy. Ment. Health* 45, 978–978 (2018).
10. New Standards will help organizations improve quality of care and reduce health disparities. *Minority Nurse* 4–4 (2013).
11. Clendon, J. & Manson, L. NZ nurses organisation comments on NZMA health equity position statement. *New Zealand Medical Journal* 124, (1331).
12. Cochrane Methods Equity. PROGRESS-Plus. Cochrane Methods Equity <https://methods.cochrane.org/equity/projects/evidence-equity/progress-plus#:~:text=PROGRESS%2DPlus%20is%20an%20acronym,stratify%20health%20opportunities%20and%20outcomes.&text=References%3A&text=Health%20promotion%2C%20inequalities%20and%20young,A%20systeme>.
13. Adami, G. et al. Response to: ‘Correspondence on “Gender disparity in authorship of guidelines and recommendations in rheumatology”’ by Stewart et al. *Annals of the Rheumatic Diseases* 03, 03 (2020).
14. De Castro, P., Heidari, S. & Babor, T. F. Sex And Gender Equity in Research (SAGER): reporting guidelines as a framework of innovation for an equitable approach to gender medicine. *Commentary. Annali Dell’Istituto Superiore di Sanita* 52, 154–157 (2016).
15. Ijaz, N. & Boon, H. Statutory Regulation of Traditional Medicine Practitioners and Practices: The Need for Distinct Policy Making Guidelines. *Journal of Alternative & Complementary Medicine* 24, 307–313 (2018).
16. Karice Hyun & Sarah Richtering. The effect of socioeconomic disadvantage on prescription of guideline-recommended medications for patients with acute coronary syndrome: systematic review and meta-analysis. PROSPERO CRD42016048503, (2016).
17. Palmer-Ross A, Ovseiko PV, Heidari S. Inadequate reporting of COVID-19 clinical studies: a renewed rationale for the Sex and Gender Equity in Research (SAGER) guidelines. *BMJ Glob Health*. 2021;6(4):e004997. doi:10.1136/bmjgh-2021-004997
18. Horn DM, Haas JS. Expanded Lung and Colorectal Cancer Screening — Ensuring Equity and Safety under New Guidelines. *N Engl J Med*. 2022;386(2):100-102. doi:10.1056/NEJMp2113332
19. McArthur C, Quigley A, Affoo R, Earl M, Moody E. Protocol for a scoping review on the methods for engaging long-term care residents with dementia in research and guideline development. *BMJ Open*. 2021;11(8):e051602. doi:10.1136/bmjopen-2021-051602

**d. Not published in English or French (n=8)**

1. Teufer, B. et al. *Zeitschrift fur Evidenz Fortbildung und Qualitat im Gesundheitswesen* 156–157, 105–112 (2020).
2. Reiter-Theil, S. et al. Clinical ethics as partnership-or how an ethical guideline on fair resource-allocation can be developed and implemented in the clinic. *Ethik Med*. 23, 93–105 (2011).

3. Welch, V. et al. Extensión PRISMA-Equidad 2012: guías para la escritura y la publicación de revisiones sistemáticas enfocadas en la equidad en salud. *Pan American Journal of Public Health* 34, 60–67 (2013).
  4. Teufer, B. et al. GRADE equity guidelines 1: Considering health equity in GRADE guideline development - introduction and rationale. *Zeitschrift fur Evidenz Fortbildung und Qualitat im Gesundheitswesen* 146, 53–59 (2019).
  5. Nusbaumer-Streit, B. et al. GRADE equity guidelines 2: Considering health equity in GRADE guideline development - equity extension of the guideline development checklist. *Zeitschrift fur Evidenz Fortbildung und Qualitat im Gesundheitswesen* 147–148, 120–126 (2019).
  6. Ebenberger, A. et al. GRADE equity guidelines 3: considering health equity in GRADE guideline development: rating the certainty of synthesized evidence. *Zeitschrift fur Evidenz Fortbildung und Qualitat im Gesundheitswesen* 153–154, 119–125 (2020).
  7. Acosta, N., Pollard, J., Mosquera, P. & Reveiz, L. The concept of equity when developing clinical practice guidelines. *Revista de Salud Publica* 13, 327–338 (2011).
  8. Wang, Z. et al. The consideration of health equity by GRADE. [Chinese]. *Chinese Journal of Evidence-Based Medicine* 18, 746–752 (2018).
- e. Unavailable full-text (n=10)**
1. Spooner, C., Harris, M. F. & Denney-Wilson, E. Centre for obesity management and prevention research excellence in primary health care. *Obesity Research and Clinical Practice* 7, e71 (2013).
  2. Bortolami, S. Immigrant women, health inequality and gender determiners: Development guidelines for a gender-oriented health systems: Padua hospital corporation experience. *Gender Medicine* 7 (5), 518 (2010).
  3. Eslava-Schmalbach, J. H., Vargas, G. S. & Mosquera, P. A. INCORPORATING EQUITY INTO DEVELOPING AND IMPLEMENTING EVIDENCE-BASED CLINICAL PRACTICE GUIDELINES. *Value Health* 14, A565–A565 (2011).
  4. Eslava-Schmalbach, J. H., Sandoval Vargas, G. & Mosquera, P. A. Incorporating equity into developing and implementing evidencebased clinical practice guidelines. *Value in Health* 14 (7), A565 (2011).
  5. Pianarosa, E. et al. Supporting Equity Through Rheumatoid Arthritis Treatment Guidelines: The Development of Logic Models for Six Populations at Risk for Inequitable Outcomes in Canada. *J. Rheumatol.* 47, 1083–1084 (2020).
  6. Shalit A, Vallely L, Bohren M, Wilson A, Homer C, Vogel J. Are Australian Clinical Practice Guideline Panels Gender Balanced? A Review of Australian Guidelines from 2010 to 2021. *Journal of Paediatrics and Child Health.* 58(SUPPL 2)(65). doi:10.1111/jpc.15946
  7. Shelton RC, Brotzman LE, Johnson D, S A, Erwin D. Understanding de-implementation and adaptation of evidence-based interventions over time in the context of changing screening guidelines: Trust and mistrust as foundational determinants of health equity in implementation science. *Implementation Science.* 2021;16(1).
  8. Rai D, Waheed S, Kapoor A, et al. Gender Disparity in Acc/Aha/Esc/Ccs Guidelines Authorship from 2005-2019. 2021;17(18 Supplement 1).
  9. Vogel J, Bohren M, Javadi D. Are who guideline panels gender and geographically balanced? a review of who guidelines published from 2008 to 2018.
  10. Nachnani E, Avington K. Female authorship of American association of clinical endocrinology clinical practice guidelines. *Endocrine Practice.* 2020;26(Supplement 2).
- f. Duplicate (n=6)**
1. O Dewidar et al. Assessment of health equity considerations in WHO guidelines from 2014-2019: A cross-sectional survey. *Advances in Evidence Synthesis: special issue Cochrane Database of Systematic Reviews* 2020 9, (2020).
  2. Pottie, K. et al. GRADE Equity Guidelines 4: Guidance on how to assess and address health equity within the evidence to decision process. 17 (2019).
  3. Pauly, B. et al. Health Equity Tools. [www.uvic.ca/elph](http://www.uvic.ca/elph).
  4. Health Quality Ontario. Insights into Quality Improvement, Health equity in the 2016/17 Quality Improvement Plans. 16.



5. Scottish Intercollegiate Guidelines Network (SIGN). *Sign 50: a guideline developer's handbook*. (SIGN, 2015).
6. Pottie K, Magwood O, Rahman P, et al. GRADE Concept Paper 1: Validating the "F.A.C.E" instrument using stakeholder perceptions of feasibility, acceptability, cost, and equity in guideline implement. *Journal of Clinical Epidemiology*. 2021;131:133-140. doi:10.1016/j.jclinepi.2020.11.018
